# Supplementary material for: Comparative compositional and functional analyses of Bothrops moojeni specimens reveal several individual variations
Source: PubMed Central journal article supplement (PMC6742229; doi:10.1371/journal.pone.0222206), 2019-09-12

Fig 2.

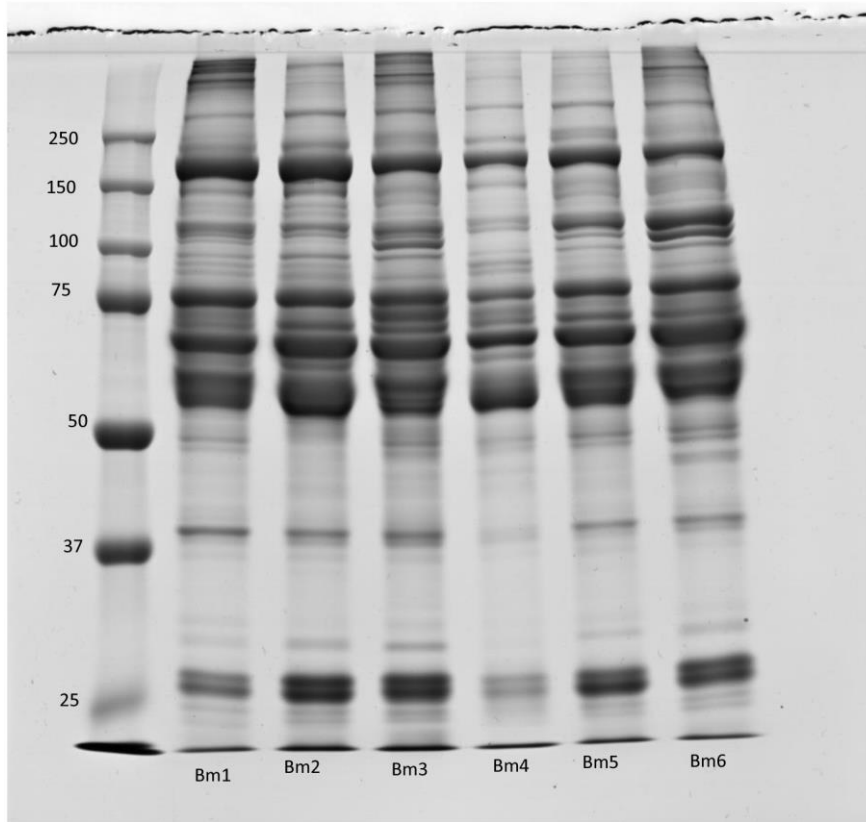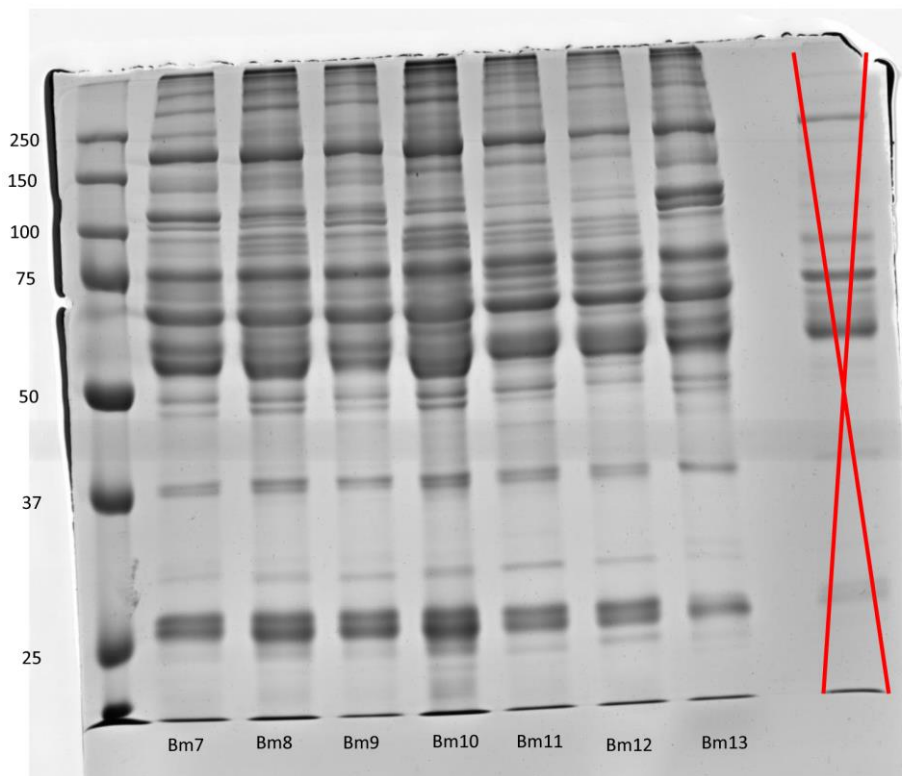

**Fig 3.**

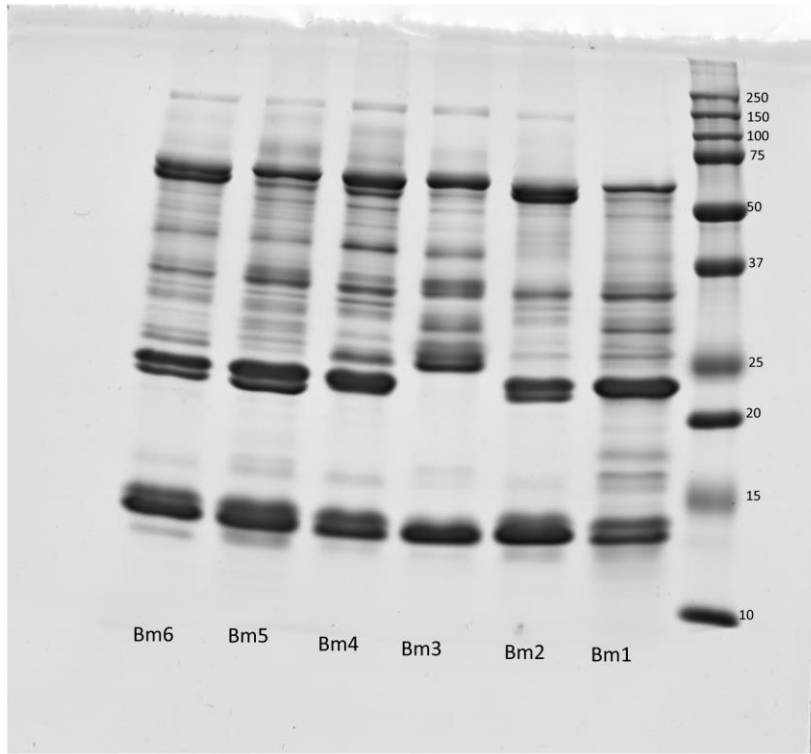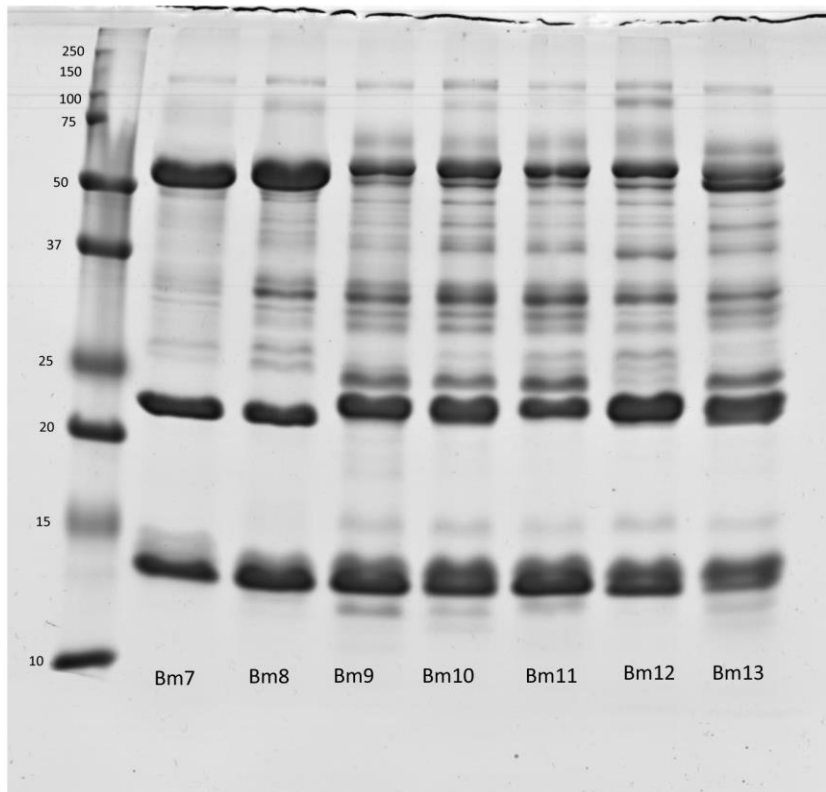

**Fig 4.**

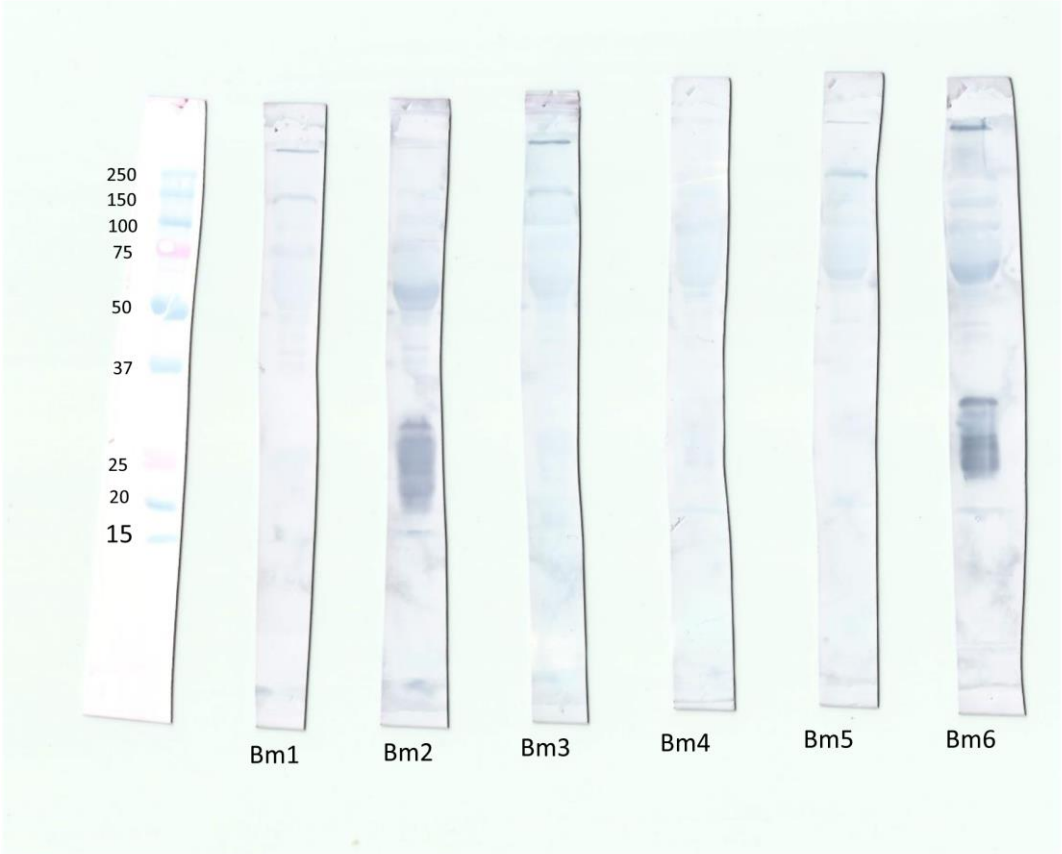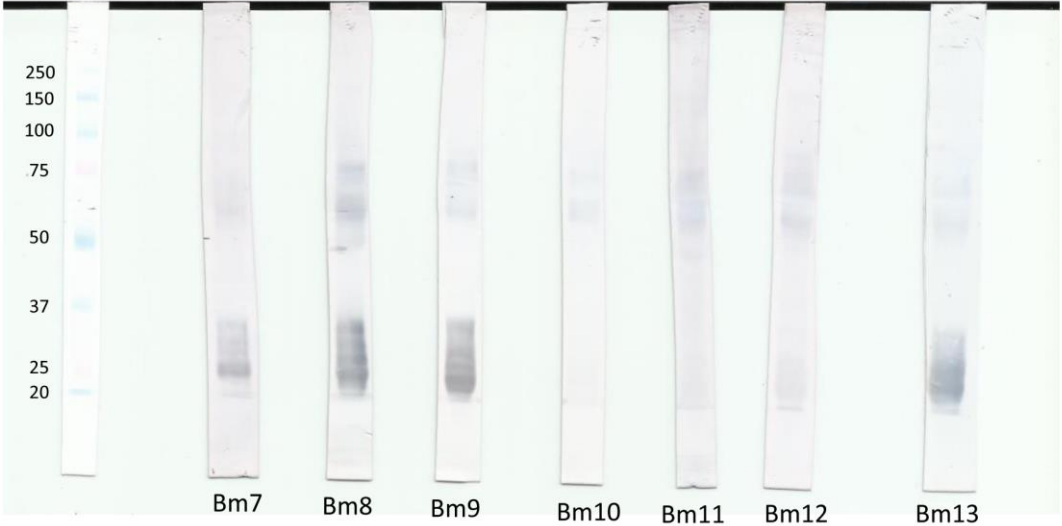

**Fig 5.**

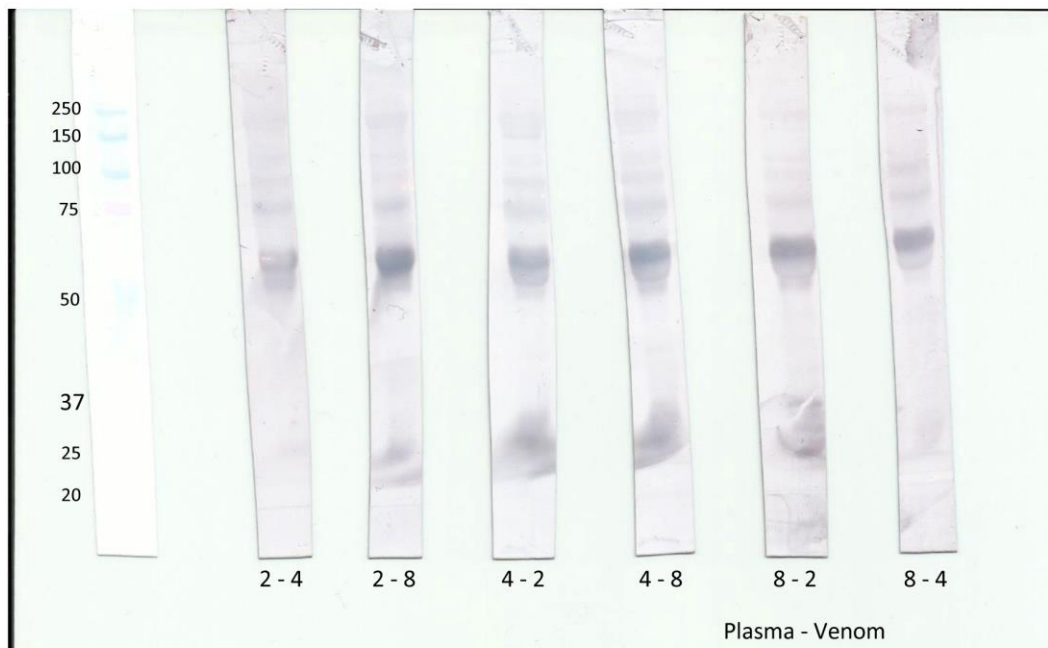

**Supplementary figure 1.**

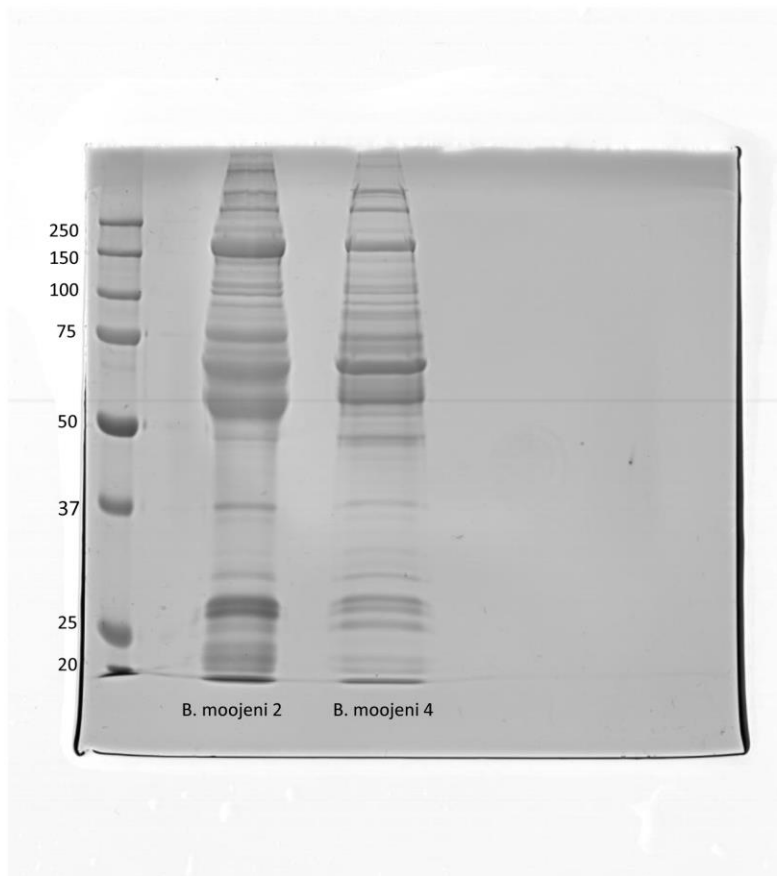

Supplement: pone.0222206.s001.pdf [file pone.0222206.s001.pdf]
