# Supplementary material for: Comparative compositional and functional analyses of Bothrops moojeni specimens reveal several individual variations
Source: PubMed Central journal article supplement (PMC6742229; doi:10.1371/journal.pone.0222206), 2019-09-12
Supplement: pone.0222206.s003.pdf [file pone.0222206.s003.pdf]

FICHA DE NECROPSIA

FN: 2342

|                                                                                                                                                                                                                                                                                                                         |                                                                                                                          |                                      |
|-------------------------------------------------------------------------------------------------------------------------------------------------------------------------------------------------------------------------------------------------------------------------------------------------------------------------|--------------------------------------------------------------------------------------------------------------------------|--------------------------------------|
| <b>Código do animal:</b> Bm0807                                                                                                                                                                                                                                                                                         | <b>Data de óbito:</b> 19/8/11                                                                                            | <b>Data de necropsia:</b> 19/8/11    |
| <b>Origem:</b> S.4                                                                                                                                                                                                                                                                                                      | <b>Comprimento (cm):</b> 28,5-102,5                                                                                      | <b>Peso (g):</b> 200g <b>Sexo:</b> ♂ |
| <b>Histórico do animal:</b><br>Estava com uma fêmea na sala 7                                                                                                                                                                                                                                                           |                                                                                                                          |                                      |
| <b>ESTADO GERAL:</b><br>( ) bom      (X) regular      ( ) caquético                                                                                                                                                                                                                                                     | <b>PELE:</b> (X) ndn ( ) em ecdise ( ) disecdise<br>(A) outros: 2 perfurações de dente, na região ventral local discreta |                                      |
| <b>MUCOSA ORAL:</b> ( ) ndn<br>Coloração: ( ) normocorada ( ) hipocorada (X) congesta ( ) cianótica ( ) hemorrágica discretamente<br>Estomatite: ( ) discreta ( ) moderada ( ) severa<br>Secreção: ( ) catarral ( ) caseosa      Quantidade: ( ) pouca ( ) muita                                                        |                                                                                                                          |                                      |
| <b>TRAQUEIA:</b> ( ) ndn<br>Secreção: ( ) mucosa ( ) serosa ( ) purulenta ( ) caseosa<br>Parasitas:<br>Outros: presença de fungos                                                                                                                                                                                       |                                                                                                                          |                                      |
| <b>PULMÃO:</b> (X) ndn<br>Coloração: ( ) normocorado ( ) hipocorado ( ) congesto ( ) hemorrágico ( ) cianótico<br>Edema: ( ) discreto ( ) moderado ( ) severo<br>Secreção: ( ) purulenta ( ) caseosa ( ) placas caseosas ( ) nódulos caseosos<br>Parasitas:<br>Outros: tecido pulmonar congesto = h/hemorrágico         |                                                                                                                          |                                      |
| <b>SACO AÉREO:</b> (X) ndn<br>Secreção: ( ) serosa ( ) mucosa ( ) purulenta ( ) caseosa<br>Parasitas:<br>Outros:                                                                                                                                                                                                        |                                                                                                                          |                                      |
| <b>TIREÓIDE:</b> ( ) ndn ( ) atrofiada ( ) aumentada ( ) hipocorada ( ) congesta<br>Outros:                                                                                                                                                                                                                             |                                                                                                                          |                                      |
| <b>CORAÇÃO:</b> ( ) ndn<br>Pericárdio: ( ) ndn (X) espessado (X) hidropericárdio ( ) hemopericárdio ( ) parasitos<br>Miocárdio: (X) ndn ( ) atrofiado ( ) hipertrofiado ( ) congesto ( ) hipocorado<br>( ) nódulos caseosos ( ) áreas de infarto ( ) outros:<br>Valva: ( ) ndn ( ) espessadas ( ) outros:<br>Parasitas: |                                                                                                                          |                                      |
| <b>VASOS SANGUÍNEOS:</b> (X) ndn ( ) engurgitados ( ) hipovolemia ( ) nódulos no endotélio<br>Outros:                                                                                                                                                                                                                   |                                                                                                                          |                                      |
| <b>FÍGADO:</b> ( ) ndn<br>Coloração: ( ) vinhácea (X) amarronzado ( ) amarelado ( ) congesto ( ) aparência noz moscada<br>Volume: ( ) atrofiado ( ) hepatomegalia / Consistência: (X) firme ( ) friável<br>Nódulos caseosos: ( ) focais ( ) difusos / Áreas de infarto: ( ) focais ( ) difusos<br>Outros:               |                                                                                                                          |                                      |
| <b>ESÔFAGO:</b> (X) ndn<br>Mucosa: ( ) ndn (X) congesta discretamente ( ) espessada ( ) hemorrágica ( ) ictérica<br>Secreção: ( ) serosa ( ) mucosa ( ) catarral ( ) purulenta ( ) caseosa ( ) enegrecida ( ) fétida<br>Outros:                                                                                         |                                                                                                                          |                                      |

2

|                                                                                                                                                                                                                                                                                                                                                           |
|-----------------------------------------------------------------------------------------------------------------------------------------------------------------------------------------------------------------------------------------------------------------------------------------------------------------------------------------------------------|
| <b>ESTÔMAGO:</b> <input checked="" type="checkbox"/> ndn<br>Mucosa: ( ) ndn ( ) congesta ( ) espessada ( ) hemorrágica ( ) icterica<br>Secreção: ( ) serosa ( ) mucosa ( ) catarral ( ) purulenta ( ) caseosa ( ) enegrecida ( ) fétida<br>Outros:                                                                                                        |
| <b>INTESTINO:</b> ( ) ndn<br>Mucosa: ( ) ndn <input checked="" type="checkbox"/> congesta ( ) espessada ( ) hemorrágica ( ) icterica<br>Secreção: ( ) serosa ( ) mucosa ( ) catarral <input checked="" type="checkbox"/> purulenta ( ) caseosa ( ) enegrecida ( ) fétida<br>Outros: <i>parciais final do intestino hemorragia e/ou secreção purulenta</i> |
| <b>PÂNCREAS:</b> <input checked="" type="checkbox"/> ndn<br>Coloração: ( ) normocorado ( ) hipocorado ( ) congesto ( ) hemorrágico<br>Volume: ( ) atrofiado ( ) hipertrofiado / Consistência: ( ) firme ( ) friável<br>Nódulos caseosos: ( ) focais ( ) difusos / Áreas de infarto: ( ) focais ( ) difusos<br>Outros:                                     |
| <b>BAÇO:</b> <input checked="" type="checkbox"/> ndn<br>Coloração: ( ) normocorado ( ) hipocorado ( ) congesto ( ) hemorrágico<br>Volume: ( ) atrofiado ( ) hipertrofiado / Consistência: ( ) firme ( ) friável<br>Nódulos caseosos: ( ) focais ( ) difusos / Áreas de infarto: ( ) focais ( ) difusos<br>Outros:                                         |
| <b>VESÍCULA BILIAR:</b> ( ) ndn <input checked="" type="checkbox"/> cheia ( ) parede espessada ( ) cálculos ( ) parasitos<br>Outros: <i>cor: amarelado amarelado</i>                                                                                                                                                                                      |
| <b>TESTÍCULOS:</b> <input checked="" type="checkbox"/> ndn<br>Coloração: ( ) normocorado ( ) hipocorado ( ) congesto ( ) hemorrágico<br>Volume: ( ) atrofiado ( ) hipertrofiado / Consistência: ( ) firme ( ) friável<br>Nódulos caseosos: ( ) focais ( ) difusos / Áreas de infarto: ( ) focais ( ) difusos<br>Outros:                                   |
| <b>OVÁRIOS:</b> ( ) ndn<br>Coloração: ( ) normocorado ( ) hipocorado ( ) congesto ( ) hemorrágico<br>Folículos ovarianos: ( ) ausentes / No estágio: ( ) I ( ) II ( ) III ( ) IV ( ) V ( ) VI<br>Corpos lúteos: ( ) ausentes ( ) presentes : quantidade<br>Ovidutos: ( ) ndn ( ) parede espessada ( ) congesto ( ) recém-parida ( ) placas caseosas       |
| <b>RINS:</b> <input checked="" type="checkbox"/> ndn<br>Coloração: ( ) normocorado ( ) hipocorado ( ) congesto ( ) hemorrágico<br>Volume: ( ) atrofiado ( ) hipertrofiado / Consistência: ( ) firme ( ) friável<br>Nódulos caseosos: ( ) focais ( ) difusos / Áreas de infarto: ( ) focais ( ) difusos<br>Outros:                                         |
| <b>ADRENAIS:</b> <input checked="" type="checkbox"/> ndn ( ) hipocoradas ( ) congestionadas ( ) hemorrágicas<br>Outros:                                                                                                                                                                                                                                   |
| <b>GORDURA CELOMÁTICA:</b> ( ) ndn <input checked="" type="checkbox"/> boa quantidade ( ) escassa ( ) quantidade regular ( ) excesso ( ) avermelhada ( ) petéquias ( ) nódulos caseosos<br>Outros:                                                                                                                                                        |
| <b>CELOMA:</b> <input checked="" type="checkbox"/> ndn ( ) presença de transudato ( ) presença de exsudato ( ) parasitos                                                                                                                                                                                                                                  |
| <b>MUSCULATURA:</b> ( ) ndn <i>região examinada localmente e hematoma na altura do fêmur</i>                                                                                                                                                                                                                                                              |
| <b>SISTEMA ÓSSEO:</b> <input checked="" type="checkbox"/> ndn                                                                                                                                                                                                                                                                                             |
| <b>DIAGNÓSTICO MACROSCÓPICO:</b>                                                                                                                                                                                                                                                                                                                          |

*muscultatura: lesão na musculatura*

963000000250206 FICHA DE NECROPSIA

FN: 2/72

|                                                                                                                                                                                                                                                                                                                                                                                                                      |                                  |                                                                                                 |
|----------------------------------------------------------------------------------------------------------------------------------------------------------------------------------------------------------------------------------------------------------------------------------------------------------------------------------------------------------------------------------------------------------------------|----------------------------------|-------------------------------------------------------------------------------------------------|
| <b>Código do animal:</b> B. moofeni                                                                                                                                                                                                                                                                                                                                                                                  | <b>Data de óbito:</b> 12/11/09   | <b>Data de necropsia:</b> 17.11.09                                                              |
| <b>Origem:</b> Ser. produção                                                                                                                                                                                                                                                                                                                                                                                         | <b>Comprimento (cm):</b> 85-98,5 | <b>Peso (g):</b> 260g <b>Sexo:</b> ♂                                                            |
| <b>Histórico do animal:</b><br>levou picada de outra moofeni                                                                                                                                                                                                                                                                                                                                                         |                                  |                                                                                                 |
| <b>ESTADO GERAL:</b><br><input checked="" type="checkbox"/> bom      ( ) regular      ( ) caquético                                                                                                                                                                                                                                                                                                                  |                                  | <b>PELE:</b> <input checked="" type="checkbox"/> ndn ( ) em ecdise ( ) disecdise<br>( ) outros: |
| <b>MUCOSA ORAL:</b> ( ) ndn<br>Coloração: ( ) normocorada ( ) hipocorada ( ) congesta ( ) cianótica <input checked="" type="checkbox"/> hemorrágica<br>Estomatite: ( ) discreta ( ) moderada ( ) severa<br>Secreção: ( ) catarral ( ) caseosa      Quantidade: ( ) pouca ( ) muita                                                                                                                                   |                                  |                                                                                                 |
| <b>TRAQUEIA:</b> <input checked="" type="checkbox"/> ndn<br>Secreção: ( ) mucosa ( ) serosa ( ) purulenta ( ) caseosa<br>Parasitas:<br>Outros:                                                                                                                                                                                                                                                                       |                                  |                                                                                                 |
| <b>PULMÃO:</b> <input checked="" type="checkbox"/> ndn<br>Coloração: ( ) normocorado ( ) hipocorado ( ) congesto ( ) hemorrágico ( ) cianótico<br>Edema: ( ) discreto ( ) moderado ( ) severo<br>Secreção: ( ) purulenta ( ) caseosa ( ) placas caseosas ( ) nódulos caseosos<br>Parasitas:<br>Outros:                                                                                                               |                                  |                                                                                                 |
| <b>SACO AÉREO:</b> <input checked="" type="checkbox"/> ndn<br>Secreção: ( ) serosa ( ) mucosa ( ) purulenta ( ) caseosa<br>Parasitas:<br>Outros:                                                                                                                                                                                                                                                                     |                                  |                                                                                                 |
| <b>TIREÓIDE:</b> <input checked="" type="checkbox"/> ndn ( ) atrofiada ( ) aumentada ( ) hipocorada ( ) congesta<br>Outros:                                                                                                                                                                                                                                                                                          |                                  |                                                                                                 |
| <b>CORAÇÃO:</b> ( ) ndn<br>Pericárdio: ( ) ndn <input checked="" type="checkbox"/> espessado ( ) hidropericárdio ( ) hemopericárdio ( ) parasitos<br>Miocárdio: ( ) ndn ( ) atrofiado ( ) hipertrofiado ( ) congesto <input checked="" type="checkbox"/> hipocorado<br>( ) nódulos caseosos ( ) áreas de infarto ( ) outros:<br>Valva: ( ) ndn ( ) espessadas ( ) outros:<br>Parasitas: região da aorta e hemorragia |                                  |                                                                                                 |
| <b>VASOS SANGÜINEOS:</b> ( ) ndn ( ) engurgitados <input checked="" type="checkbox"/> hipovolemia ( ) nódulos no endotélio<br>Outros:                                                                                                                                                                                                                                                                                |                                  |                                                                                                 |
| <b>FÍGADO:</b> <input checked="" type="checkbox"/> ndn<br>Coloração: ( ) vinhácea ( ) amarronzado ( ) amarelado ( ) congesto ( ) aparência noz moscada<br>Volume: ( ) atrofiado ( ) hepatomegalia / Consistência: ( ) firme ( ) friável<br>Nódulos caseosos: ( ) focais ( ) difusos / Áreas de infarto: ( ) focais ( ) difusos<br>Outros:                                                                            |                                  |                                                                                                 |
| <b>ESÔFAGO:</b> <input checked="" type="checkbox"/> ndn<br>Mucosa: ( ) ndn ( ) congesta ( ) espessada ( ) hemorrágica ( ) ictérica<br>Secreção: ( ) serosa ( ) mucosa ( ) catarral ( ) purulenta ( ) caseosa ( ) enegrecida ( ) fétida<br>Outros:                                                                                                                                                                    |                                  |                                                                                                 |

3

|                                                                                                                                                                                                                                                                                                                                                     |
|-----------------------------------------------------------------------------------------------------------------------------------------------------------------------------------------------------------------------------------------------------------------------------------------------------------------------------------------------------|
| <b>ESTÔMAGO:</b> <input checked="" type="checkbox"/> ndn<br>Mucosa: ( ) ndn ( ) congesta ( ) espessada ( ) hemorrágica ( ) icterica<br>Secreção: ( ) serosa ( ) mucosa ( ) catarral ( ) purulenta ( ) caseosa ( ) enegrecida ( ) fétida<br>Outros:                                                                                                  |
| <b>INTESTINO:</b> <input checked="" type="checkbox"/> ndn<br>Mucosa: ( ) ndn ( ) congesta ( ) espessada ( ) hemorrágica ( ) icterica<br>Secreção: ( ) serosa ( ) mucosa ( ) catarral ( ) purulenta ( ) caseosa ( ) enegrecida ( ) fétida<br>Outros:                                                                                                 |
| <b>PÂNCREAS:</b> <input checked="" type="checkbox"/> ndn<br>Coloração: ( ) normocorado ( ) hipocorado ( ) congesto ( ) hemorrágico<br>Volume: ( ) atrofiado ( ) hipertrofiado / Consistência: ( ) firme ( ) friável<br>Nódulos caseosos: ( ) focais ( ) difusos / Áreas de infarto: ( ) focais ( ) difusos<br>Outros:                               |
| <b>BAÇO:</b> <input checked="" type="checkbox"/> ndn<br>Coloração: ( ) normocorado ( ) hipocorado ( ) congesto ( ) hemorrágico<br>Volume: ( ) atrofiado ( ) hipertrofiado / Consistência: ( ) firme ( ) friável<br>Nódulos caseosos: ( ) focais ( ) difusos / Áreas de infarto: ( ) focais ( ) difusos<br>Outros:                                   |
| <b>VESÍCULA BILIAR:</b> <input checked="" type="checkbox"/> ndn ( ) cheia ( ) parede espessada ( ) cálculos ( ) parasitos<br>Outros:                                                                                                                                                                                                                |
| <b>TESTÍCULOS:</b> <input checked="" type="checkbox"/> ndn<br>Coloração: ( ) normocorado ( ) hipocorado ( ) congesto ( ) hemorrágico<br>Volume: ( ) atrofiado ( ) hipertrofiado / Consistência: ( ) firme ( ) friável<br>Nódulos caseosos: ( ) focais ( ) difusos / Áreas de infarto: ( ) focais ( ) difusos<br>Outros:                             |
| <b>OVÁRIOS:</b> ( ) ndn<br>Coloração: ( ) normocorado ( ) hipocorado ( ) congesto ( ) hemorrágico<br>Folículos ovarianos: ( ) ausentes / No estágio: ( ) I ( ) II ( ) III ( ) IV ( ) V ( ) VI<br>Corpos lúteos: ( ) ausentes ( ) presentes : quantidade<br>Ovidutos: ( ) ndn ( ) parede espessada ( ) congesto ( ) recém-parida ( ) placas caseosas |
| <b>RINS:</b> ( ) ndn<br>Coloração: ( ) normocorado <input checked="" type="checkbox"/> hipocorado ( ) congesto ( ) hemorrágico<br>Volume: ( ) atrofiado ( ) hipertrofiado / Consistência: ( ) firme ( ) friável<br>Nódulos caseosos: ( ) focais ( ) difusos / Áreas de infarto: ( ) focais ( ) difusos<br>Outros:                                   |
| <b>ADRENAIS:</b> <input checked="" type="checkbox"/> ndn ( ) hipocoradas ( ) congestas ( ) hemorrágicas<br>Outros:                                                                                                                                                                                                                                  |
| <b>GORDURA CELOMÁTICA:</b> ( ) ndn <input checked="" type="checkbox"/> boa quantidade ( ) escassa ( ) quantidade regular ( ) excesso ( ) avermelhada ( ) petéquias ( ) nódulos caseosos<br>Outros:                                                                                                                                                  |
| <b>CELOMA:</b> <input checked="" type="checkbox"/> ndn ( ) presença de transudato ( ) presença de exsudato ( ) parasitos                                                                                                                                                                                                                            |
| <b>MUSCULATURA:</b> <input checked="" type="checkbox"/> ndn                                                                                                                                                                                                                                                                                         |
| <b>SISTEMA ÓSSEO:</b> <input checked="" type="checkbox"/> ndn                                                                                                                                                                                                                                                                                       |

**DIAGNÓSTICO MACROSCÓPICO:**

*hemorragia*

963000000277244

## FICHA DE NECROPSIA

FN: 2176

|                                                                                                                                                                                                                                                                                                                                                                                         |                                                                                                                                                                                                                                                                                                                   |                                                                                                  |
|-----------------------------------------------------------------------------------------------------------------------------------------------------------------------------------------------------------------------------------------------------------------------------------------------------------------------------------------------------------------------------------------|-------------------------------------------------------------------------------------------------------------------------------------------------------------------------------------------------------------------------------------------------------------------------------------------------------------------|--------------------------------------------------------------------------------------------------|
| <b>Código do animal:</b> B. moojeni                                                                                                                                                                                                                                                                                                                                                     | <b>Data de óbito:</b> 12/11/09                                                                                                                                                                                                                                                                                    | <b>Data de necropsia:</b> 14/11/09                                                               |
| <b>Origem:</b> serp produzida                                                                                                                                                                                                                                                                                                                                                           | <b>Comprimento (cm):</b> 965-112                                                                                                                                                                                                                                                                                  | <b>Peso (g):</b> 280g                                                                            |
| <b>Sexo:</b> ♂                                                                                                                                                                                                                                                                                                                                                                          |                                                                                                                                                                                                                                                                                                                   |                                                                                                  |
| <b>Histórico do animal:</b><br>picado por outra moojeni                                                                                                                                                                                                                                                                                                                                 |                                                                                                                                                                                                                                                                                                                   |                                                                                                  |
| <b>ESTADO GERAL:</b><br><input checked="" type="checkbox"/> bom      ( ) regular      ( ) caquético                                                                                                                                                                                                                                                                                     |                                                                                                                                                                                                                                                                                                                   | <b>PELE:</b> <input checked="" type="checkbox"/> ndn ( ) em ecdise ( ) diseccdise<br>( ) outros: |
| <b>MUCOSA ORAL:</b> ( ) ndn<br>Coloração: ( ) normocorada ( ) hipocorada <input checked="" type="checkbox"/> congesta ( ) cianótica ( ) hemorrágica<br>Estomatite: ( ) discreta ( ) moderada ( ) severa<br>Secreção: <input checked="" type="checkbox"/> catarral ( ) caseosa      Quantidade: <input checked="" type="checkbox"/> pouca ( ) muita                                      |                                                                                                                                                                                                                                                                                                                   |                                                                                                  |
| <b>TRAQUEIA:</b> <input checked="" type="checkbox"/> ndn<br>Secreção: ( ) mucosa ( ) serosa ( ) purulenta ( ) caseosa<br>Parasitas:<br>Outros:                                                                                                                                                                                                                                          |                                                                                                                                                                                                                                                                                                                   |                                                                                                  |
| <b>PULMÃO:</b> ( ) ndn<br>Coloração: ( ) normocorado <input checked="" type="checkbox"/> hipocorado ( ) congesto ( ) hemorrágico ( ) cianótico<br>Edema: ( ) discreto <input checked="" type="checkbox"/> moderado ( ) severo<br>Secreção: ( ) purulenta ( ) caseosa ( ) placas caseosas ( ) nódulos caseosos<br>Parasitas:<br>Outros:                                                  |                                                                                                                                                                                                                                                                                                                   |                                                                                                  |
| <b>SACO AÉREO:</b> <input checked="" type="checkbox"/> ndn<br>Secreção: ( ) serosa ( ) mucosa ( ) purulenta ( ) caseosa<br>Parasitas:<br>Outros:                                                                                                                                                                                                                                        |                                                                                                                                                                                                                                                                                                                   |                                                                                                  |
| <b>TIREÓIDE:</b> <input checked="" type="checkbox"/> ndn ( ) atrofiada ( ) aumentada ( ) hipocorada ( ) congesta<br>Outros:                                                                                                                                                                                                                                                             |                                                                                                                                                                                                                                                                                                                   |                                                                                                  |
| <b>CORAÇÃO:</b> ( ) ndn<br>Pericárdio: ( ) ndn <input checked="" type="checkbox"/> espessado ( ) hidropericárdio ( ) hemopericárdio ( ) parasitos<br>Miocárdio: ( ) ndn ( ) atrofiado ( ) hipertrofiado ( ) congesto <input checked="" type="checkbox"/> hipocorado<br>( ) nódulos caseosos ( ) áreas de infarto ( ) outros:<br>Valva: ( ) ndn ( ) espessadas ( ) outros:<br>Parasitas: |                                                                                                                                                                                                                                                                                                                   |                                                                                                  |
| 5                                                                                                                                                                                                                                                                                                                                                                                       | <b>VASOS SANGUÍNEOS:</b> ( ) ndn <input checked="" type="checkbox"/> engurgitados <input checked="" type="checkbox"/> hipovolemia ( ) nódulos no endotélio<br>Outros: <i>na região da picada (cranial e no 1/3 médio)</i>                                                                                         |                                                                                                  |
| <b>FÍGADO:</b> ( ) ndn<br>Coloração: ( ) vinhácea <input checked="" type="checkbox"/> amarronzado ( ) amarelado ( ) congesto ( ) aparência noz moscada<br>Volume: ( ) atrofiado ( ) hepatomegalia / Consistência: ( ) firme ( ) friável<br>Nódulos caseosos: ( ) focais ( ) difusos / Áreas de infarto: ( ) focais <input checked="" type="checkbox"/> difusos<br>Outros:               |                                                                                                                                                                                                                                                                                                                   |                                                                                                  |
| 6                                                                                                                                                                                                                                                                                                                                                                                       | <b>ESÔFAGO:</b> <input checked="" type="checkbox"/> ndn <i>perto do local da picada</i><br>Mucosa: ( ) ndn <input checked="" type="checkbox"/> congesta ( ) espessada ( ) hemorrágica ( ) ictérica<br>Secreção: ( ) serosa ( ) mucosa ( ) catarral ( ) purulenta ( ) caseosa ( ) enegrecida ( ) fétida<br>Outros: |                                                                                                  |

**ESTÔMAGO:**  ndn

Mucosa: ( ) ndn ( ) congesta ( ) espessada ( ) hemorrágica ( ) ictérica  
Secreção: ( ) serosa ( ) mucosa ( ) catarral ( ) purulenta ( ) caseosa ( ) enegrecida ( ) fétida

Outros:

**INTESTINO:**  ndn

Mucosa: ( ) ndn ( ) congesta ( ) espessada ( ) hemorrágica ( ) ictérica  
Secreção: ( ) serosa ( ) mucosa ( ) catarral ( ) purulenta ( ) caseosa ( ) enegrecida ( ) fétida

Outros:

**PÂNCREAS:** ( ) ndn

Coloração: ( ) normocorado ( ) hipocorado  congesto ( ) hemorrágico  
Volume: ( ) atrofiado ( ) hipertrofiado / Consistência: ( ) firme ( ) friável  
Nódulos caseosos: ( ) focais ( ) difusos / Áreas de infarto: ( ) focais ( ) difusos

Outros:

**BAÇO:** ( ) ndn

Coloração: ( ) normocorado ( ) hipocorado  congesto ( ) hemorrágico  
Volume: ( ) atrofiado ( ) hipertrofiado / Consistência: ( ) firme ( ) friável  
Nódulos caseosos: ( ) focais ( ) difusos / Áreas de infarto: ( ) focais ( ) difusos

Outros:

**VESÍCULA BILIAR:** ( ) ndn ( ) cheia ( ) parede espessada ( ) cálculos ( ) parasitos

Outros: *vazia (um pouco)*

**TESTÍCULOS:** ( ) ndn

Coloração: ( ) normocorado ( ) hipocorado  congesto ( ) hemorrágico  
Volume: ( ) atrofiado ( ) hipertrofiado / Consistência: ( ) firme ( ) friável  
Nódulos caseosos: ( ) focais ( ) difusos / Áreas de infarto: ( ) focais ( ) difusos

Outros: *o testículo esquerdo atrofiado*

**OVÁRIOS:** ( ) ndn

Coloração: ( ) normocorado ( ) hipocorado  congesto ( ) hemorrágico  
Folículos ovarianos: ( ) ausentes / No estágio: ( ) I ( ) II ( ) III ( ) IV ( ) V ( ) VI  
Corpos lúteos: ( ) ausentes ( ) presentes / quantidade  
Ovidutos: ( ) ndn ( ) parede espessada  congesto ( ) recém-parida ( ) placas caseosas

**RINS:** ( ) ndn

Coloração: ( ) normocorado  hipocorado ( ) congesto ( ) hemorrágico  
Volume: ( ) atrofiado ( ) hipertrofiado / Consistência: ( ) firme ( ) friável  
Nódulos caseosos: ( ) focais ( ) difusos / Áreas de infarto: ( ) focais ( ) difusos

Outros:

**ADRENAIS:**  ndn ( ) hipocoradas ( ) congestas ( ) hemorrágicas

Outros:

**GORDURA CELOMÁTICA:** ( ) ndn  boa quantidade ( ) escassa ( ) quantidade regular  
( ) excesso ( ) avermelhada ( ) petéquias ( ) nódulos caseosos

Outros:

**CELOMA:** ( ) ndn ( ) presença de transudato ( ) presença de exsudato ( ) parasitos

**MUSCULATURA:** ( ) ndn *muscultura avermelhada na área da*

**SISTEMA ÓSSEO:**  ndn *picada*

**DIAGNÓSTICO MACROSCÓPICO:**

*não evidente*

*→ presença de coágulo e hemorragia no 1/3 medial*



|                                                                                                                                                                                                                                                                                                                                                                                     |
|-------------------------------------------------------------------------------------------------------------------------------------------------------------------------------------------------------------------------------------------------------------------------------------------------------------------------------------------------------------------------------------|
| <b>ESTÔMAGO:</b> <input checked="" type="checkbox"/> ndn<br>Mucosa: ( ) ndn ( ) congesta ( ) espessada ( ) hemorrágica ( ) ictérica<br>Secreção: ( ) serosa ( ) mucosa ( ) catarral ( ) purulenta ( ) caseosa ( ) enegrecida ( ) fétida<br>Outros:                                                                                                                                  |
| <b>INTESTINO:</b> <input checked="" type="checkbox"/> ndn<br>Mucosa: ( ) ndn ( ) congesta ( ) espessada ( ) hemorrágica ( ) ictérica<br>Secreção: ( ) serosa ( ) mucosa ( ) catarral ( ) purulenta ( ) caseosa ( ) enegrecida ( ) fétida<br>Outros:                                                                                                                                 |
| <b>PÂNCREAS:</b> <input checked="" type="checkbox"/> ndn<br>Coloração: ( ) normocorado ( ) hipocorado ( ) congesto ( ) hemorrágico<br>Volume: ( ) atrofiado ( ) hipertrofiado / Consistência: ( ) firme ( ) friável<br>Nódulos caseosos: ( ) focais ( ) difusos / Áreas de infarto: ( ) focais ( ) difusos<br>Outros:                                                               |
| <b>BAÇO:</b> <input checked="" type="checkbox"/> ndn<br>Coloração: ( ) normocorado ( ) hipocorado ( ) congesto ( ) hemorrágico<br>Volume: ( ) atrofiado ( ) hipertrofiado / Consistência: ( ) firme ( ) friável<br>Nódulos caseosos: ( ) focais ( ) difusos / Áreas de infarto: ( ) focais ( ) difusos<br>Outros:                                                                   |
| <b>VESÍCULA BILIAR:</b> ( ) ndn <input checked="" type="checkbox"/> cheia ( ) parede espessada ( ) cálculos ( ) parasitos<br>Outros:                                                                                                                                                                                                                                                |
| <b>TESTÍCULOS:</b> ( ) ndn<br>Coloração: ( ) normocorado ( ) hipocorado <input checked="" type="checkbox"/> congesto ( ) hemorrágico<br>Volume: ( ) atrofiado ( ) hipertrofiado / Consistência: ( ) firme ( ) friável<br>Nódulos caseosos: ( ) focais ( ) difusos / Áreas de infarto: ( ) focais ( ) difusos<br>Outros:                                                             |
| <b>OVÁRIOS:</b> ( ) ndn<br>Coloração: ( ) normocorado ( ) hipocorado <input checked="" type="checkbox"/> congesto ( ) hemorrágico<br>Folículos ovarianos: ( ) ausentes / No estágio: ( ) I ( ) II ( ) III ( ) IV ( ) V ( ) VI<br>Corpos lúteos: ( ) ausentes ( ) presentes : quantidade<br>Ovidutos: ( ) ndn ( ) parede espessada ( ) congesto ( ) recém-parida ( ) placas caseosas |
| <b>RINS:</b> ( ) ndn<br>Coloração: ( ) normocorado <input checked="" type="checkbox"/> hipocorado ( ) congesto ( ) hemorrágico<br>Volume: ( ) atrofiado ( ) hipertrofiado / Consistência: ( ) firme ( ) friável<br>Nódulos caseosos: ( ) focais ( ) difusos / Áreas de infarto: ( ) focais ( ) difusos<br>Outros:                                                                   |
| <b>ADRENAIS:</b> <input checked="" type="checkbox"/> ndn ( ) hipocoradas ( ) congestas ( ) hemorrágicas<br>Outros:                                                                                                                                                                                                                                                                  |
| <b>GORDURA CELOMÁTICA:</b> ( ) ndn <input checked="" type="checkbox"/> boa quantidade ( ) escassa ( ) quantidade regular ( ) excesso ( ) avermelhada ( ) petéquias ( ) nódulos caseosos<br>Outros:                                                                                                                                                                                  |
| <b>CELOMA:</b> <input checked="" type="checkbox"/> ndn ( ) presença de transudato ( ) presença de exsudato ( ) parasitos                                                                                                                                                                                                                                                            |
| <b>MUSCULATURA:</b> <input checked="" type="checkbox"/> ndn                                                                                                                                                                                                                                                                                                                         |
| <b>SISTEMA ÓSSEO:</b> <input checked="" type="checkbox"/> ndn                                                                                                                                                                                                                                                                                                                       |
| <b>DIAGNÓSTICO MACROSCÓPICO:</b><br><p style="text-align: center;">hemorragia</p>                                                                                                                                                                                                                                                                                                   |



96300000288226

## FICHA DE NECROPSIA

FN: 2173

Código do animal: *B. mojeni* | Data de óbito: *12/11/09* | Data de necropsia: *17/11/09*  
 Origem: *Serp. modica* | Comprimento (cm): *90-10.5* | Peso (g): *320* | Sexo: *♂*

Histórico do animal:

*picado por outra mojeni*

ESTADO GERAL:

 bom ( ) regular ( ) caquéticoPELE:  ndn ( ) em ecdise ( ) disecdise ( ) outros:

MUCOSA ORAL: ( ) ndn

Coloração: ( ) normocorada ( ) hipocorada  congesta ( ) cianótica ( ) hemorrágica

Estomatite: ( ) discreta ( ) moderada ( ) severa

Secreção: ( ) catarral ( ) caseosa Quantidade: ( ) pouca ( ) muita

TRAQUEIA:  ndnSecreção: ( ) mucosa ( ) serosa ( ) purulenta ( ) caseosa  Sangue

Parasitas:

Outros:

PULMÃO:  ndnColoração: ( ) normocorado ( ) hipocorado ( ) congesto  hemorrágico ( ) cianótico

Edema: ( ) discreto ( ) moderado ( ) severo

Secreção: ( ) purulenta ( ) caseosa ( ) placas caseosas ( ) nódulos caseosos

Parasitas:

Outros:

SACO AÉREO:  ndn

Secreção: ( ) serosa ( ) mucosa ( ) purulenta ( ) caseosa

Parasitas:

Outros:

TIREÓIDE:  ndn ( ) atrofiada ( ) aumentada ( ) hipocorada  congesta

Outros:

CORAÇÃO: ( ) ndn

Pericárdio: ( ) ndn  espessado ( ) hidropericárdio ( ) hemopericárdio ( ) parasitos

Miocárdio: ( ) ndn ( ) atrofiado ( ) hipertrofiado ( ) congesto ( ) hipocorado

( ) nódulos caseosos ( ) áreas de infarto ( ) outros:

Valva: ( ) ndn ( ) espessadas ( ) outros:

Parasitas:

VASOS SANGUÍNEOS: ( ) ndn ( ) engurgitados ( ) hipovolemia ( ) nódulos no endotélio

Outros: *engurgitado na parte superior*

FÍGADO: ( ) ndn

Coloração: ( ) vinhácea ( ) amarronzado ( ) amarelado ( ) congesto ( ) aparência noz moscada  avermelhada

Volume: ( ) atrofiado ( ) hepatomegalia / Consistência: ( ) firme ( ) friável

Nódulos caseosos: ( ) focais ( ) difusos / Áreas de infarto: ( ) focais ( ) difusos

Outros:

ESÔFAGO:  ndn

Mucosa: ( ) ndn ( ) congesta ( ) espessada ( ) hemorrágica ( ) ictérica

Secreção: ( ) serosa ( ) mucosa ( ) catarral ( ) purulenta ( ) caseosa ( ) enegrecida ( ) fétida

Outros:

96300000291138

## FICHA DE NECROPSIA

FN: 2175

|                                                                                                                                                                                                                                                                                                                 |                                      |                                                                                                                                                    |
|-----------------------------------------------------------------------------------------------------------------------------------------------------------------------------------------------------------------------------------------------------------------------------------------------------------------|--------------------------------------|----------------------------------------------------------------------------------------------------------------------------------------------------|
| <b>Código do animal:</b> B. moojeni                                                                                                                                                                                                                                                                             | <b>Data de óbito:</b> 12/11/09       | <b>Data de necropsia:</b> 17/11/09                                                                                                                 |
| <b>Origem:</b> Serp. modu.                                                                                                                                                                                                                                                                                      | <b>Comprimento (cm):</b> 82,5 - 96,5 | <b>Peso (g):</b> 225                                                                                                                               |
| <b>Sexo:</b> ♂                                                                                                                                                                                                                                                                                                  |                                      |                                                                                                                                                    |
| <b>Histórico do animal:</b>                                                                                                                                                                                                                                                                                     |                                      |                                                                                                                                                    |
| picado por outra moojeni                                                                                                                                                                                                                                                                                        |                                      |                                                                                                                                                    |
| <b>ESTADO GERAL:</b>                                                                                                                                                                                                                                                                                            |                                      | <b>PELE:</b>                                                                                                                                       |
| <input checked="" type="checkbox"/> bom <input type="checkbox"/> regular <input type="checkbox"/> caquético                                                                                                                                                                                                     |                                      | <input checked="" type="checkbox"/> ndn <input type="checkbox"/> em ecdise <input type="checkbox"/> disecidise<br><input type="checkbox"/> outros: |
| <b>MUCOSA ORAL:</b> <input type="checkbox"/> ndn                                                                                                                                                                                                                                                                |                                      |                                                                                                                                                    |
| Coloração: <input type="checkbox"/> normocorada <input type="checkbox"/> hipocorada <input checked="" type="checkbox"/> congesta <input type="checkbox"/> cianótica <input type="checkbox"/> hemorrágica                                                                                                        |                                      |                                                                                                                                                    |
| Estomatite: <input type="checkbox"/> discreta <input type="checkbox"/> moderada <input type="checkbox"/> sévera                                                                                                                                                                                                 |                                      |                                                                                                                                                    |
| Secreção: <input type="checkbox"/> catarral <input type="checkbox"/> caseosa      Quantidade: <input type="checkbox"/> pouca <input type="checkbox"/> muita                                                                                                                                                     |                                      |                                                                                                                                                    |
| <b>TRAQUÉIA:</b> <input checked="" type="checkbox"/> ndn                                                                                                                                                                                                                                                        |                                      |                                                                                                                                                    |
| Secreção: <input type="checkbox"/> mucosa <input type="checkbox"/> serosa <input type="checkbox"/> purulenta <input type="checkbox"/> caseosa                                                                                                                                                                   |                                      |                                                                                                                                                    |
| Parasitas:                                                                                                                                                                                                                                                                                                      |                                      |                                                                                                                                                    |
| Outros:                                                                                                                                                                                                                                                                                                         |                                      |                                                                                                                                                    |
| <b>PULMÃO:</b> <input type="checkbox"/> ndn                                                                                                                                                                                                                                                                     |                                      |                                                                                                                                                    |
| Coloração: <input type="checkbox"/> normocorado <input type="checkbox"/> hipocorado <input checked="" type="checkbox"/> congesto <input type="checkbox"/> hemorrágico <input type="checkbox"/> cianótico                                                                                                        |                                      |                                                                                                                                                    |
| Edema: <input type="checkbox"/> discreto <input checked="" type="checkbox"/> moderado <input type="checkbox"/> severo                                                                                                                                                                                           |                                      |                                                                                                                                                    |
| Secreção: <input type="checkbox"/> purulenta <input type="checkbox"/> caseosa <input type="checkbox"/> placas caseosas <input type="checkbox"/> nódulos caseosos                                                                                                                                                |                                      |                                                                                                                                                    |
| Parasitas:                                                                                                                                                                                                                                                                                                      |                                      |                                                                                                                                                    |
| Outros: hemorragia na porção cranial do pulmão                                                                                                                                                                                                                                                                  |                                      |                                                                                                                                                    |
| <b>SACO AÉREO:</b> <input checked="" type="checkbox"/> ndn                                                                                                                                                                                                                                                      |                                      |                                                                                                                                                    |
| Secreção: <input type="checkbox"/> serosa <input type="checkbox"/> mucosa <input type="checkbox"/> purulenta <input type="checkbox"/> caseosa                                                                                                                                                                   |                                      |                                                                                                                                                    |
| Parasitas:                                                                                                                                                                                                                                                                                                      |                                      |                                                                                                                                                    |
| Outros:                                                                                                                                                                                                                                                                                                         |                                      |                                                                                                                                                    |
| <b>TIREÓIDE:</b> <input checked="" type="checkbox"/> ndn <input type="checkbox"/> atrofiada <input type="checkbox"/> aumentada <input type="checkbox"/> hipocorada <input type="checkbox"/> congesta                                                                                                            |                                      |                                                                                                                                                    |
| Outros:                                                                                                                                                                                                                                                                                                         |                                      |                                                                                                                                                    |
| <b>CORAÇÃO:</b> <input checked="" type="checkbox"/> ndn                                                                                                                                                                                                                                                         |                                      |                                                                                                                                                    |
| Pericárdio: <input type="checkbox"/> ndn <input type="checkbox"/> espessado <input type="checkbox"/> hidropericárdio <input type="checkbox"/> hemopericárdio <input type="checkbox"/> parasitos                                                                                                                 |                                      |                                                                                                                                                    |
| Miocárdio: <input type="checkbox"/> ndn <input type="checkbox"/> atrofiado <input type="checkbox"/> hipertrofiado <input type="checkbox"/> congesto <input type="checkbox"/> hipocorado<br><input type="checkbox"/> nódulos caseosos <input type="checkbox"/> áreas de infarto <input type="checkbox"/> outros: |                                      |                                                                                                                                                    |
| Valva: <input type="checkbox"/> ndn <input type="checkbox"/> espessadas <input type="checkbox"/> outros:                                                                                                                                                                                                        |                                      |                                                                                                                                                    |
| Parasitas:                                                                                                                                                                                                                                                                                                      |                                      |                                                                                                                                                    |
| <b>VASOS SANGUÍNEOS:</b> <input type="checkbox"/> ndn <input checked="" type="checkbox"/> engurgitados <input checked="" type="checkbox"/> hipovolemia <input type="checkbox"/> nódulos no endotélio                                                                                                            |                                      |                                                                                                                                                    |
| Outros: >> no geral na região da picada                                                                                                                                                                                                                                                                         |                                      |                                                                                                                                                    |
| <b>FÍGADO:</b> <input type="checkbox"/> ndn                                                                                                                                                                                                                                                                     |                                      |                                                                                                                                                    |
| Coloração: <input type="checkbox"/> vinhácea <input checked="" type="checkbox"/> amarronzado <input type="checkbox"/> amarelado <input type="checkbox"/> congesto <input type="checkbox"/> aparência noz moscada                                                                                                |                                      |                                                                                                                                                    |
| Volume: <input type="checkbox"/> atrofiado <input type="checkbox"/> hepatomegalia      /      Consistência: <input checked="" type="checkbox"/> firme <input type="checkbox"/> friável                                                                                                                          |                                      |                                                                                                                                                    |
| Nódulos caseosos: <input checked="" type="checkbox"/> focais <input type="checkbox"/> difusos      /      Áreas de infarto: <input type="checkbox"/> focais <input type="checkbox"/> difusos                                                                                                                    |                                      |                                                                                                                                                    |
| Outros:                                                                                                                                                                                                                                                                                                         |                                      |                                                                                                                                                    |
| <b>ESÔFAGO:</b> <input checked="" type="checkbox"/> ndn                                                                                                                                                                                                                                                         |                                      |                                                                                                                                                    |
| Mucosa: <input type="checkbox"/> ndn <input type="checkbox"/> congesta <input type="checkbox"/> espessada <input type="checkbox"/> hemorrágica <input type="checkbox"/> ictérica                                                                                                                                |                                      |                                                                                                                                                    |
| Secreção: <input type="checkbox"/> serosa <input type="checkbox"/> mucosa <input type="checkbox"/> catarral <input type="checkbox"/> purulenta <input type="checkbox"/> caseosa <input type="checkbox"/> enegrecida <input type="checkbox"/> fétida                                                             |                                      |                                                                                                                                                    |
| Outros:                                                                                                                                                                                                                                                                                                         |                                      |                                                                                                                                                    |

12

13

**ESTÔMAGO:**  ndnMucosa: ( ) ndn ( ) congesta ( ) espessada ( ) hemorrágica ( ) ictérica  
Secreção: ( ) serosa ( ) mucosa ( ) catarral ( ) purulenta ( ) caseosa ( ) enegrecida ( ) fétida

Outros:

**INTESTINO:**  ndnMucosa: ( ) ndn ( ) congesta ( ) espessada ( ) hemorrágica ( ) ictérica  
Secreção: ( ) serosa ( ) mucosa ( ) catarral ( ) purulenta ( ) caseosa ( ) enegrecida ( ) fétida

Outros:

**PÂNCREAS:**  ndnColoração: ( ) normocorado ( ) hipocorado ( ) congesto ( ) hemorrágico  
Volume: ( ) atrofiado ( ) hipertrofiado / Consistência: ( ) firme ( ) friável  
Nódulos caseosos: ( ) focais ( ) difusos / Áreas de infarto: ( ) focais ( ) difusos

Outros:

**BAÇO:**  ndnColoração: ( ) normocorado ( ) hipocorado ( ) congesto ( ) hemorrágico  
Volume: ( ) atrofiado ( ) hipertrofiado / Consistência: ( ) firme ( ) friável  
Nódulos caseosos: ( ) focais ( ) difusos / Áreas de infarto: ( ) focais ( ) difusos

Outros:

**VESÍCULA BILIAR:**  ndn ( ) cheia ( ) parede espessada ( ) cálculos ( ) parasitos

Outros:

**TESTÍCULOS:** ( ) ndnColoração: ( ) normocorado ( ) hipocorado  congesto ( ) hemorrágico  
Volume: ( ) atrofiado ( ) hipertrofiado / Consistência: ( ) firme ( ) friável  
Nódulos caseosos: ( ) focais ( ) difusos / Áreas de infarto: ( ) focais ( ) difusos

Outros:

**OVÁRIOS:** ( ) ndnColoração: ( ) normocorado ( ) hipocorado ( ) congesto ( ) hemorrágico  
Folículos ovarianos: ( ) ausentes / No estágio: ( ) I ( ) II ( ) III ( ) IV ( ) V ( ) VI  
Corpos lúteos: ( ) ausentes ( ) presentes : quantidade  
Ovidutos: ( ) ndn ( ) parede espessada ( ) congesto ( ) recém-parida ( ) placas caseosas**RINS:** ( ) ndnColoração: ( ) normocorado  hipocorado ( ) congesto ( ) hemorrágico  
Volume: ( ) atrofiado ( ) hipertrofiado / Consistência: ( ) firme ( ) friável  
Nódulos caseosos: ( ) focais ( ) difusos / Áreas de infarto: ( ) focais ( ) difusos

Outros:

**ADRENAIS:** ( ) ndn ( ) hipocoradas  congestas ( ) hemorrágicas

Outros:

**GORDURA CELOMÁTICA:** ( ) ndn  boa quantidade ( ) escassa ( ) quantidade regular  
( ) excesso ( ) avermelhada ( ) petéquias ( ) nódulos caseosos

Outros:

**CELOMA:**  ndn ( ) presença de transudato ( ) presença de exsudato ( ) parasitos**MUSCULATURA:** ( ) ndn *hemorragia no SC (1/3 uniaxial) movável local da picada.***SISTEMA ÓSSEO:** ( ) ndn**DIAGNÓSTICO MACROSCÓPICO:***hemorragia*

B.m

963000000299360 FICHA DE NECROPSIA

FN: 2170

|                                                       |                                      |                                    |
|-------------------------------------------------------|--------------------------------------|------------------------------------|
| <b>Código do animal:</b> 963000000299                 | <b>Data de óbito:</b> 12/11/09       | <b>Data de necropsia:</b> 17/11/09 |
| <b>Origem:</b> serp. modúlo                           | <b>Comprimento (cm):</b> 83,5 - 97,5 | <b>Peso (g):</b> 250g              |
| <b>Sexo:</b> ♂                                        |                                      |                                    |
| <b>Histórico do animal:</b> picado por outra mofojeni |                                      |                                    |

|                                                                                                     |                                                                                                                                                   |
|-----------------------------------------------------------------------------------------------------|---------------------------------------------------------------------------------------------------------------------------------------------------|
| <b>ESTADO GERAL:</b><br><input checked="" type="checkbox"/> bom      ( ) regular      ( ) caquético | <b>PELE:</b> <input checked="" type="checkbox"/> ndn ( ) em ecdise ( ) disecdisse<br>( ) outros:<br>na região mediana do corpo a pele está saindo |
|-----------------------------------------------------------------------------------------------------|---------------------------------------------------------------------------------------------------------------------------------------------------|

**MUCOSA ORAL:**  ndn  
 Coloração: ( ) normocorada ( ) hipocorada ( ) congesta ( ) cianótica ( ) hemorrágica  
 Estomatite: ( ) discreta ( ) moderada ( ) severa  
 Secreção: ( ) catarral ( ) caseosa      Quantidade: ( ) pouca ( ) muita

**TRAQUÉIA:**  ndn  
 Secreção: ( ) mucosa ( ) serosa ( ) purulenta ( ) caseosa  
 Parasitos:  
 Outros:

**PULMÃO:**  ndn  
 Coloração: ( ) normocorado ( ) hipocorado ( ) congesto ( ) hemorrágico ( ) cianótico  
 Edema: ( ) discreto ( ) moderado ( ) severo  
 Secreção: ( ) purulenta ( ) caseosa ( ) placas caseosas ( ) nódulos caseosos  
 Parasitos:  
 Outros:

**SACO AÉREO:**  ndn  
 Secreção: ( ) serosa ( ) mucosa ( ) purulenta ( ) caseosa  
 Parasitos:  
 Outros:

**TIREÓIDE:** ( ) ndn ( ) atrofiada ( ) aumentada  hipocorada ( ) congesta  
 Outros:

**CORAÇÃO:**  ndn  
 Pericárdio: ( ) ndn ( ) espessado ( ) hidropericárdio ( ) hemopericárdio ( ) parasitos  
 Miocárdio: ( ) ndn ( ) atrofiado ( ) hipertrofiado ( ) congesto ( ) hipocorado  
 ( ) nódulos caseosos ( ) áreas de infarto ( ) outros:  
 Valva: ( ) ndn ( ) espessadas ( ) outros:  
 Parasitos:

15 **VASOS SANGUÍNEOS:** ( ) ndn  engurgitados ( ) hipovolemia ( ) nódulos no endotélio  
 Outros: na região mediana do corpo (provável sítio da picada)

16 **FÍGADO:** ( ) ndn  
 Coloração: ( ) vinhácea ( ) amarronzado  amarelado ( ) congesto ( ) aparência noz moscada  
 Volume: ( ) atrofiado ( ) hepatomegalia / Consistência:  firme ( ) friável  
 Nódulos caseosos: ( ) focais ( ) difusos / Áreas de infarto: ( ) focais ( ) difusos  
 Outros: presença de coágulos na região caudal do fígado

**ESÔFAGO:**  ndn  
 Mucosa: ( ) ndn ( ) congesta ( ) espessada ( ) hemorrágica ( ) ictérica  
 Secreção: ( ) serosa ( ) mucosa ( ) catarral ( ) purulenta ( ) caseosa ( ) enegrecida ( ) fétida  
 Outros:

|                                                                                                                                                                                                                                                                                                                                                                                                                                                                                                                                                                                                                                                                                                                                                                    |
|--------------------------------------------------------------------------------------------------------------------------------------------------------------------------------------------------------------------------------------------------------------------------------------------------------------------------------------------------------------------------------------------------------------------------------------------------------------------------------------------------------------------------------------------------------------------------------------------------------------------------------------------------------------------------------------------------------------------------------------------------------------------|
| <b>ESTÔMAGO:</b> <input checked="" type="checkbox"/> ndn<br>Mucosa: <input type="checkbox"/> ndn <input type="checkbox"/> congesta <input type="checkbox"/> espessada <input type="checkbox"/> hemorrágica <input type="checkbox"/> icterícia<br>Secreção: <input type="checkbox"/> serosa <input type="checkbox"/> mucosa <input type="checkbox"/> catarral <input type="checkbox"/> purulenta <input type="checkbox"/> caseosa <input type="checkbox"/> enegrecida <input type="checkbox"/> fétida<br>Outros:                                                                                                                                                                                                                                                    |
| <b>INTESTINO:</b> <input checked="" type="checkbox"/> ndn<br>Mucosa: <input type="checkbox"/> ndn <input type="checkbox"/> congesta <input type="checkbox"/> espessada <input type="checkbox"/> hemorrágica <input type="checkbox"/> icterícia<br>Secreção: <input type="checkbox"/> serosa <input type="checkbox"/> mucosa <input type="checkbox"/> catarral <input type="checkbox"/> purulenta <input type="checkbox"/> caseosa <input type="checkbox"/> enegrecida <input type="checkbox"/> fétida<br>Outros:                                                                                                                                                                                                                                                   |
| <b>PÂNCREAS:</b> <input checked="" type="checkbox"/> ndn<br>Coloração: <input type="checkbox"/> normocorado <input type="checkbox"/> hipocorado <input type="checkbox"/> congesto <input type="checkbox"/> hemorrágico<br>Volume: <input type="checkbox"/> atrofiado <input type="checkbox"/> hipertrofiado / Consistência: <input type="checkbox"/> firme <input type="checkbox"/> friável<br>Nódulos caseosos: <input type="checkbox"/> focais <input type="checkbox"/> difusos / Áreas de infarto: <input type="checkbox"/> focais <input type="checkbox"/> difusos<br>Outros:                                                                                                                                                                                  |
| <b>BAÇO:</b> <input type="checkbox"/> ndn<br>Coloração: <input type="checkbox"/> normocorado <input type="checkbox"/> hipocorado <input type="checkbox"/> congesto <input type="checkbox"/> hemorrágico<br>Volume: <input type="checkbox"/> atrofiado <input type="checkbox"/> hipertrofiado / Consistência: <input type="checkbox"/> firme <input type="checkbox"/> friável<br>Nódulos caseosos: <input type="checkbox"/> focais <input type="checkbox"/> difusos / Áreas de infarto: <input type="checkbox"/> focais <input type="checkbox"/> difusos<br>Outros:                                                                                                                                                                                                 |
| <b>VESÍCULA BILIAR:</b> <input checked="" type="checkbox"/> ndn <input type="checkbox"/> cheia <input type="checkbox"/> parede espessada <input type="checkbox"/> cálculos <input type="checkbox"/> parasitos<br>Outros:                                                                                                                                                                                                                                                                                                                                                                                                                                                                                                                                           |
| <b>TESTÍCULOS:</b> <input type="checkbox"/> ndn<br>Coloração: <input type="checkbox"/> normocorado <input type="checkbox"/> hipocorado <input checked="" type="checkbox"/> congesto <input type="checkbox"/> hemorrágico<br>Volume: <input type="checkbox"/> atrofiado <input type="checkbox"/> hipertrofiado / Consistência: <input type="checkbox"/> firme <input type="checkbox"/> friável<br>Nódulos caseosos: <input type="checkbox"/> focais <input type="checkbox"/> difusos / Áreas de infarto: <input type="checkbox"/> focais <input type="checkbox"/> difusos<br>Outros:                                                                                                                                                                                |
| <b>OVÁRIOS:</b> <input type="checkbox"/> ndn<br>Coloração: <input type="checkbox"/> normocorado <input type="checkbox"/> hipocorado <input type="checkbox"/> congesto <input type="checkbox"/> hemorrágico<br>Folículos ovarianos: <input type="checkbox"/> ausentes / No estágio: <input type="checkbox"/> I <input type="checkbox"/> II <input type="checkbox"/> III <input type="checkbox"/> IV <input type="checkbox"/> V <input type="checkbox"/> VI<br>Corpos lúteos: <input type="checkbox"/> ausentes <input type="checkbox"/> presentes : quantidade<br>Ovidutos: <input type="checkbox"/> ndn <input type="checkbox"/> parede espessada <input type="checkbox"/> congesto <input type="checkbox"/> recém-parida <input type="checkbox"/> placas caseosas |
| <b>RINS:</b> <input checked="" type="checkbox"/> ndn<br>Coloração: <input type="checkbox"/> normocorado <input type="checkbox"/> hipocorado <input type="checkbox"/> congesto <input type="checkbox"/> hemorrágico<br>Volume: <input type="checkbox"/> atrofiado <input type="checkbox"/> hipertrofiado / Consistência: <input type="checkbox"/> firme <input type="checkbox"/> friável<br>Nódulos caseosos: <input type="checkbox"/> focais <input type="checkbox"/> difusos / Áreas de infarto: <input type="checkbox"/> focais <input type="checkbox"/> difusos<br>Outros:                                                                                                                                                                                      |
| <b>ADRENAIS:</b> <input type="checkbox"/> ndn <input type="checkbox"/> hipocoradas <input checked="" type="checkbox"/> congestas <input type="checkbox"/> hemorrágicas<br>Outros:                                                                                                                                                                                                                                                                                                                                                                                                                                                                                                                                                                                  |
| <b>GORDURA CELOMÁTICA:</b> <input type="checkbox"/> ndn <input checked="" type="checkbox"/> boa quantidade <input type="checkbox"/> escassa <input type="checkbox"/> quantidade regular <input type="checkbox"/> excesso <input type="checkbox"/> avermelhada <input type="checkbox"/> petéquias <input type="checkbox"/> nódulos caseosos<br>Outros:                                                                                                                                                                                                                                                                                                                                                                                                              |
| <b>CELOMA:</b> <input checked="" type="checkbox"/> ndn <input type="checkbox"/> presença de transudato <input type="checkbox"/> presença de exsudato <input type="checkbox"/> parasitos                                                                                                                                                                                                                                                                                                                                                                                                                                                                                                                                                                            |
| <b>MUSCULATURA:</b> <input type="checkbox"/> ndn <i>avermelhada na área da picada</i>                                                                                                                                                                                                                                                                                                                                                                                                                                                                                                                                                                                                                                                                              |
| <b>SISTEMA ÓSSEO:</b> <input checked="" type="checkbox"/> ndn                                                                                                                                                                                                                                                                                                                                                                                                                                                                                                                                                                                                                                                                                                      |
| <b>DIAGNÓSTICO MACROSCÓPICO:</b><br><i>hemorragia interna</i>                                                                                                                                                                                                                                                                                                                                                                                                                                                                                                                                                                                                                                                                                                      |
